# Supplementary material for: Theoretical insight into the interaction on Ni and Cu surfaces for HMF hydrogenation: a density functional theory study
Source: Royal Society of Chemistry journal article supplement (doi:10.1039/d1nj04154a), 2021-01-01
Supplement: d1nj04154a1.pdf [file d1nj04154a1.pdf]

## Supplementary Information

### Theoretical insight into the interaction on Ni and Cu surfaces for HMF hydrogenation: a density functional theory study

Aunyamanee Plucksacholatarn,<sup>a</sup> Bunrat Tharat,<sup>b</sup> Suwit Suthirakun,<sup>b</sup> Kajornsak  
Faungnawakij,<sup>\*a</sup> and Anchalee Junkaew<sup>\*a</sup>

<sup>a</sup>*National Nanotechnology Center (NANOTEC), National Science and Technology Development Agency (NSTDA), Pathumthani, 12120, Thailand*

<sup>b</sup>*School of Chemistry, Institute of Science, Suranaree University of Technology, Nakhon Ratchasima, 30000, Thailand*

Corresponding authors' emails: anchalee@nanotec.or.th (A. Junkaew) and kajornsak@nanotec.or.th (K. Faungnawakij)

## 1. Optimization of isolated molecules

### (a) HMF

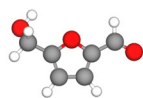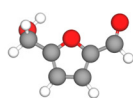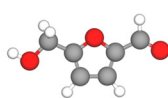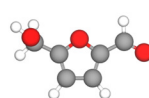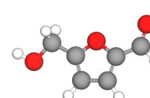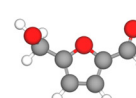

### (b) DHMF

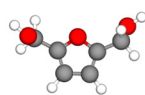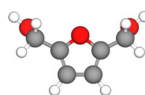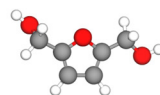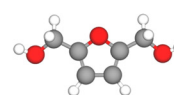

### (c) DHMTHF

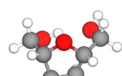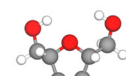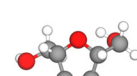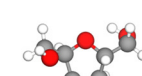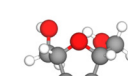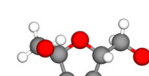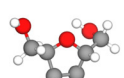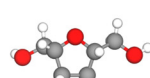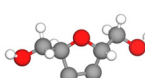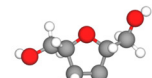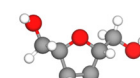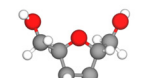

**Figure S1** The possible configurations of molecules optimized by PAWPBE-D3. The energy of most stable configuration (config1) is used as the reference for each molecule.

## 2. Adsorption on Ni and Cu surfaces

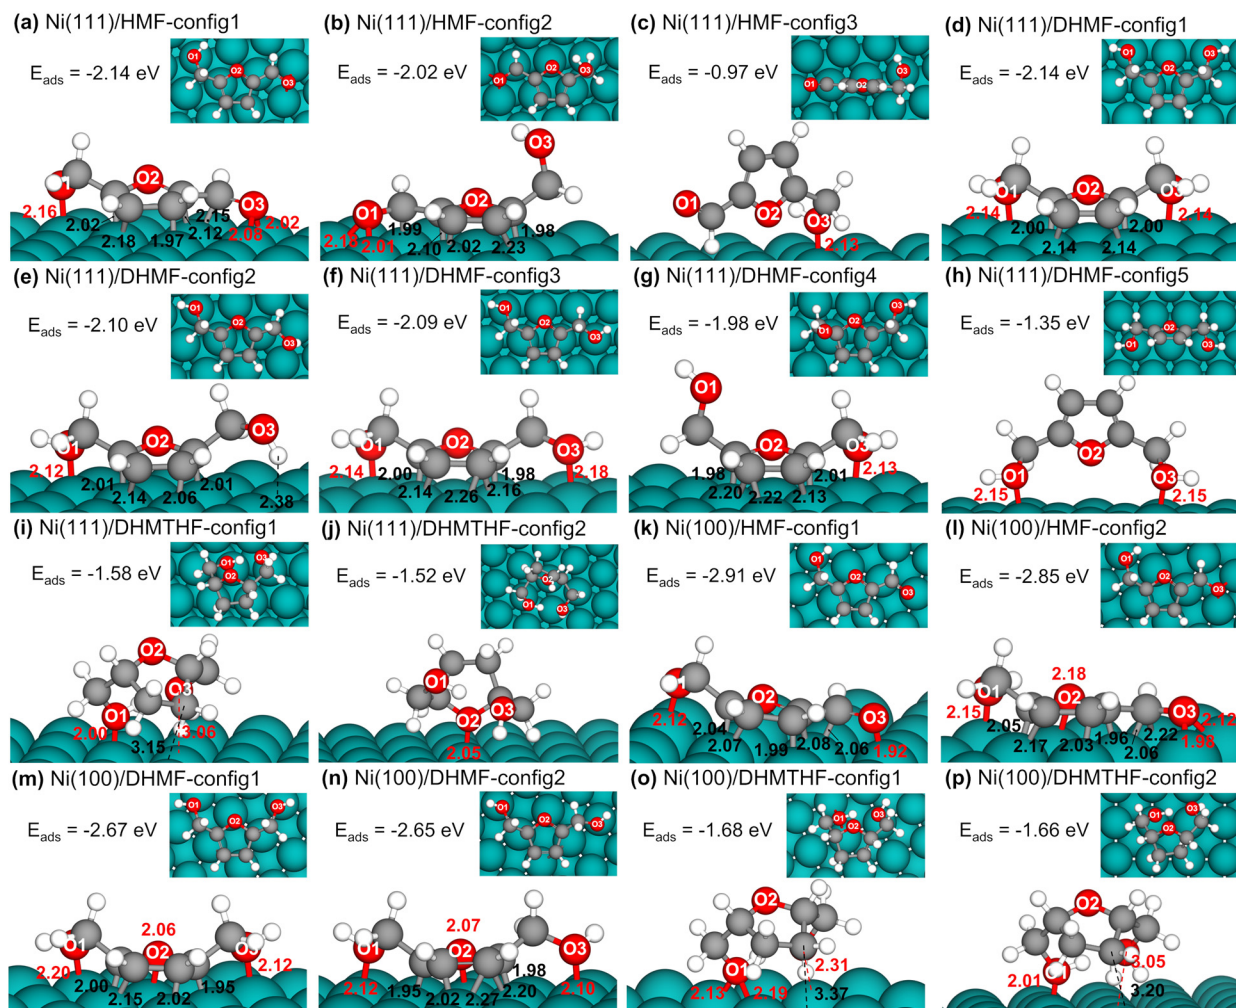

**Figure S2** The optimized adsorption configurations of HMF, DHMF and DHMTHF on Ni surfaces

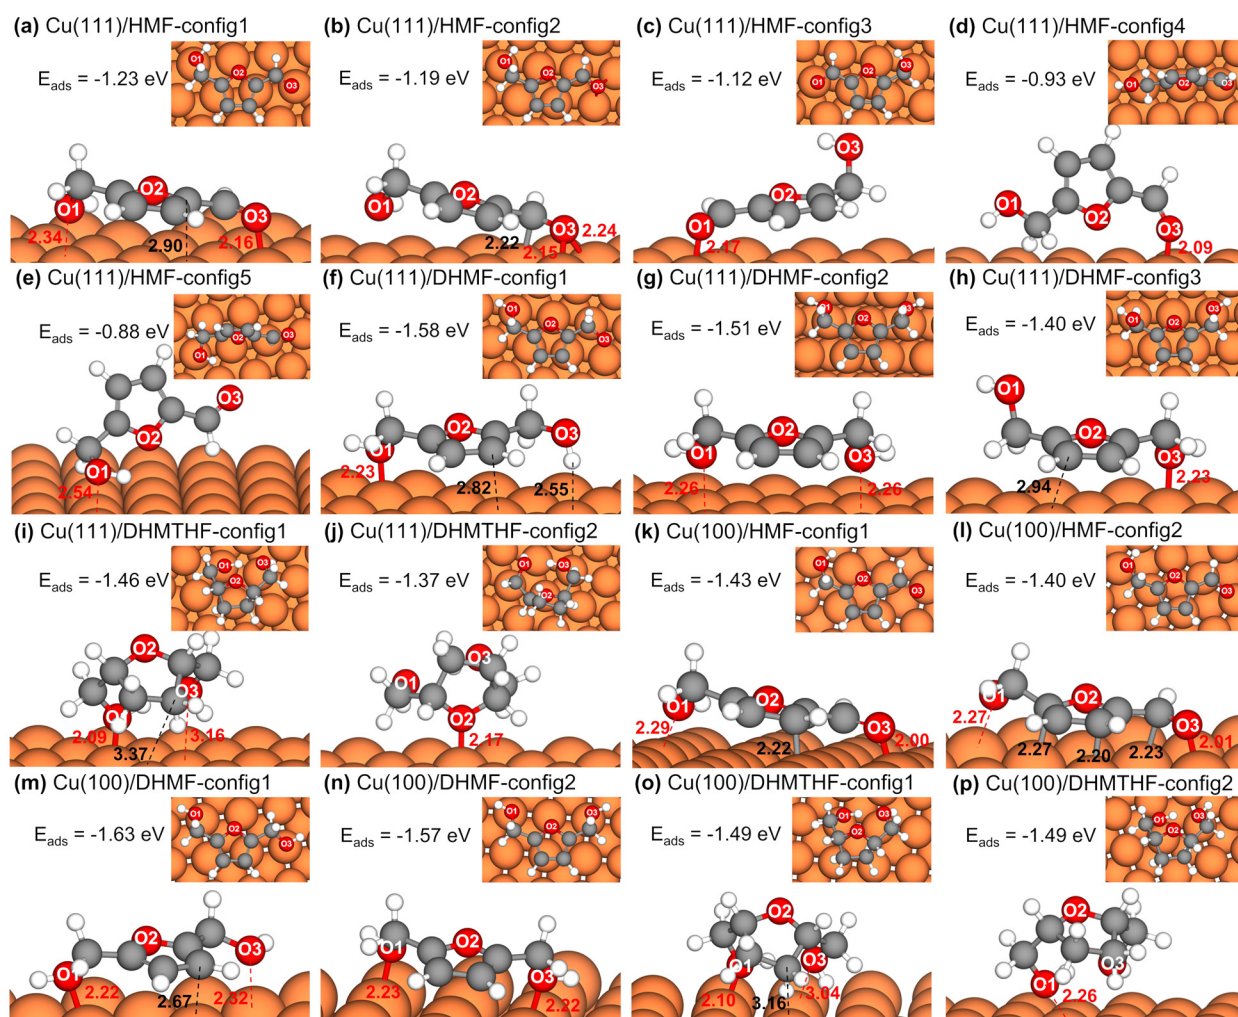

**Figure S3** The optimized adsorption configurations of HMF, DHMF and DHMTHF on Cu surfaces

### 3. Charge analysis

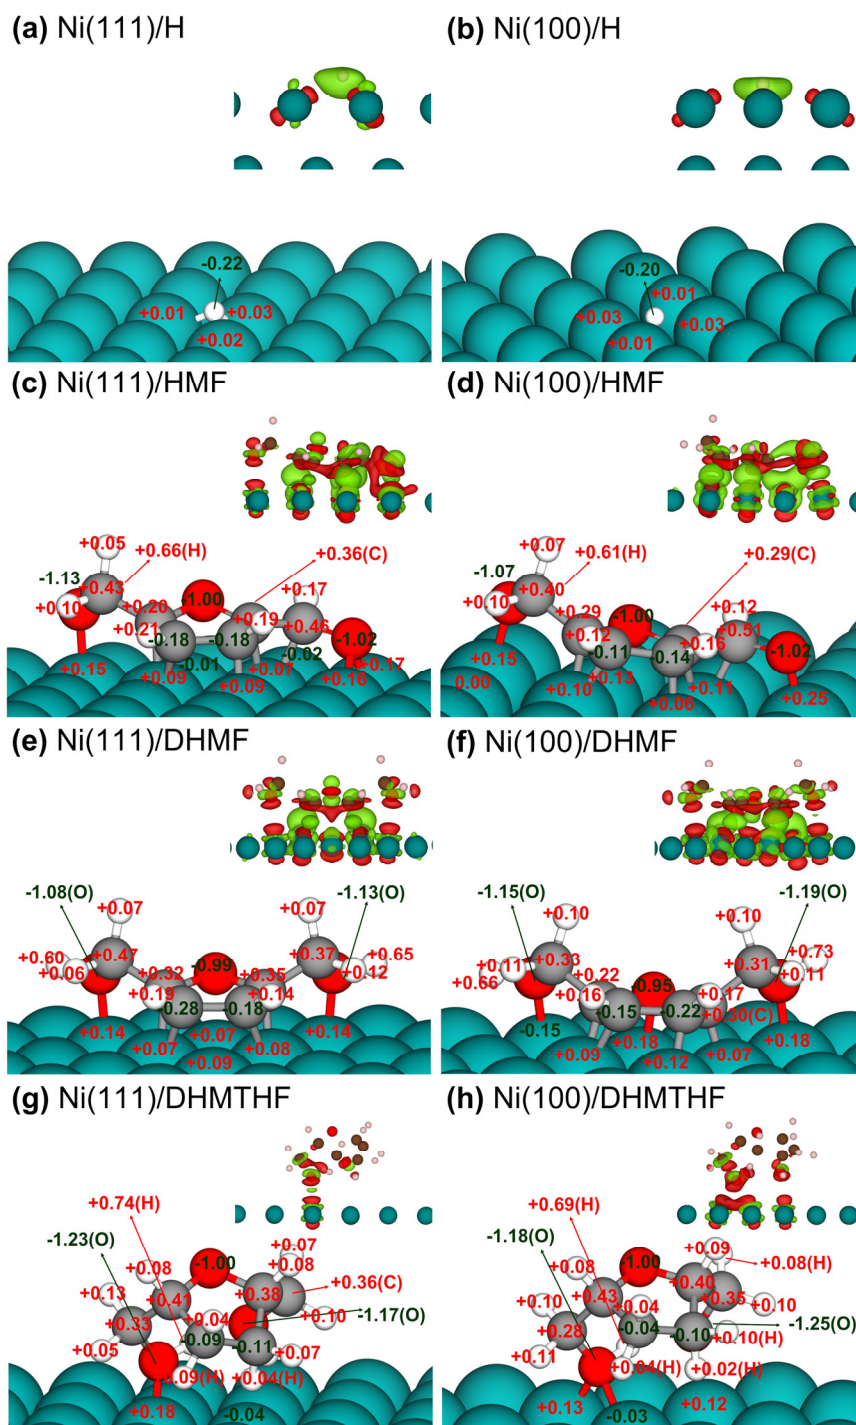

**Figure S4.** The Bader charge change of selected atoms and charge density difference (presented in the top right panel) of (a-b) H, (c-d) HMF, (e-f) DHMF, and (g-h) DHMTHF adsorptions on Ni(111) and Ni(100) surfaces. The green and red regions with isosurface of  $\pm 0.005 \text{ |e|/\text{\AA}^3}$  represent charge accumulation and depletion, respectively.

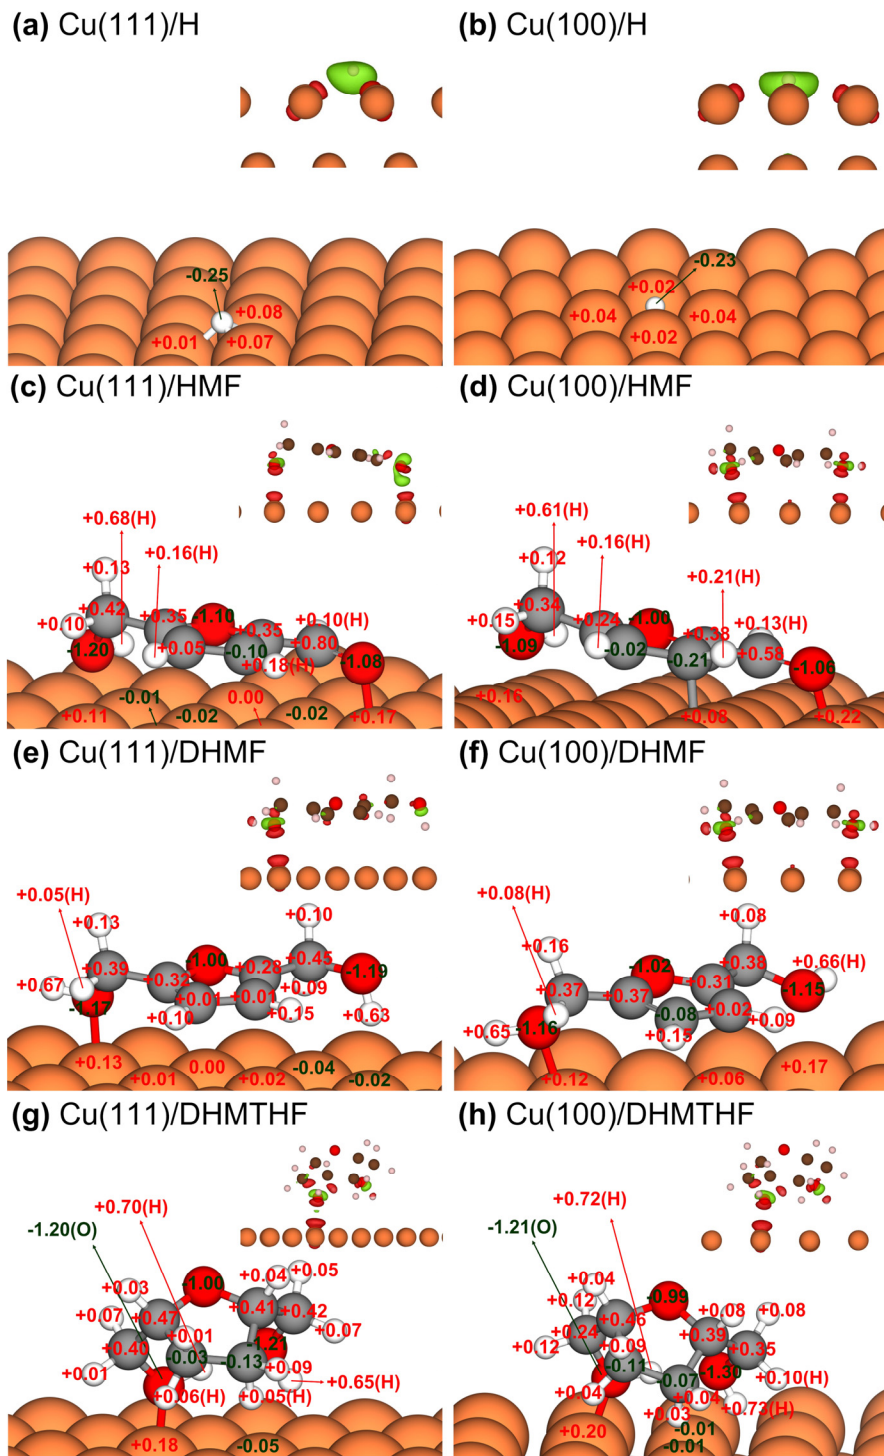

**Figure S5.** The Bader charge change of selected atoms and charge density difference (presented in the top right panel) of (a-b) H, (c-d) HMF, (e-f) DHMF, and (g-h) DHMTHF adsorptions on Cu(111) and Cu(100) surfaces. The green and red regions with isosurface of  $\pm 0.005 \text{ |e|/\text{\AA}^3}$  represent charge accumulation and depletion, respectively.

**Table S1** The Bader charge difference (in  $|e|$ ) of the adsorbed HMF compared with the pre-adsorbed HMF.

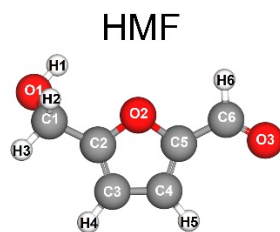

|           | Ni(111) | Ni(100) | Cu(111) | Cu(100) |
|-----------|---------|---------|---------|---------|
| <b>C1</b> | 0.0312  | -0.0068 | 0.0136  | -0.0618 |
| <b>C2</b> | -0.0566 | 0.0271  | 0.0874  | -0.0143 |
| <b>C3</b> | -0.2850 | -0.2097 | -0.0551 | -0.1176 |
| <b>C4</b> | -0.1960 | -0.1532 | -0.1199 | -0.2322 |
| <b>C5</b> | 0.1378  | 0.0633  | 0.1270  | 0.1533  |
| <b>C6</b> | -0.5455 | -0.4913 | -0.2032 | -0.4206 |
| <b>O1</b> | -0.0424 | 0.0114  | -0.1103 | -0.0034 |
| <b>O2</b> | 0.0282  | 0.0454  | -0.0754 | 0.0254  |
| <b>O3</b> | 0.0092  | 0.0092  | -0.0442 | -0.0328 |
| <b>H1</b> | 0.0447  | -0.0053 | 0.0696  | -0.0080 |
| <b>H2</b> | -0.0432 | -0.0209 | 0.0323  | 0.0263  |
| <b>H3</b> | -0.0303 | -0.0311 | -0.0296 | 0.0134  |
| <b>H4</b> | 0.1117  | 0.0167  | 0.0638  | 0.0573  |
| <b>H5</b> | 0.0333  | 0.0089  | 0.0321  | 0.0528  |
| <b>H6</b> | 0.1220  | 0.0744  | 0.0551  | 0.0873  |

**Table S2** The Bader charge difference (in  $|e|$ ) of the adsorbed DHMF compared with the pre-adsorbed DHMF.

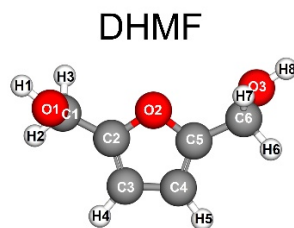

|           | <b>Ni(111)</b> | <b>Ni(100)</b> | <b>Cu(111)</b> | <b>Cu(100)</b> |
|-----------|----------------|----------------|----------------|----------------|
| <b>C1</b> | 0.0922         | -0.0542        | 0.0108         | -0.0069        |
| <b>C2</b> | -0.0209        | -0.1155        | -0.0212        | -0.0112        |
| <b>C3</b> | -0.4156        | -0.2894        | -0.1257        | -0.2162        |
| <b>C4</b> | -0.1547        | -0.2019        | 0.0278         | 0.0433         |
| <b>C5</b> | 0.0793         | 0.0258         | 0.0045         | 0.0797         |
| <b>C6</b> | -0.0126        | -0.0730        | 0.0657         | -0.0051        |
| <b>O1</b> | 0.0546         | -0.0198        | -0.0391        | -0.0259        |
| <b>O2</b> | 0.0473         | 0.0847         | 0.0398         | 0.0131         |
| <b>O3</b> | -0.0051        | -0.0671        | -0.0736        | -0.0274        |
| <b>H1</b> | -0.0373        | 0.0246         | 0.0311         | 0.0106         |
| <b>H2</b> | -0.0063        | 0.0257         | -0.0317        | -0.0044        |
| <b>H3</b> | -0.0234        | 0.0257         | -0.0518        | -0.0832        |
| <b>H4</b> | 0.1350         | 0.1019         | 0.0423         | 0.0952         |
| <b>H5</b> | -0.0041        | 0.0212         | 0.0046         | -0.0537        |
| <b>H6</b> | 0.0513         | 0.0369         | 0.0258         | 0.0048         |
| <b>H7</b> | -0.0237        | 0.0091         | -0.0093        | 0.0134         |
| <b>H8</b> | 0.0159         | 0.0900         | -0.0071        | 0.0211         |



**Table S3** The Bader charge difference (in |e|) of the adsorbed DHMTHF compared with free DHMTHF molecules.

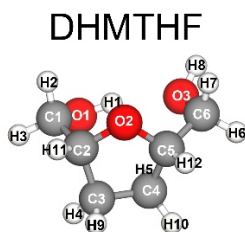

|            | Ni(111) | Ni(100) | Cu(111) | Cu(100) |
|------------|---------|---------|---------|---------|
| <b>C1</b>  | -0.1024 | -0.1559 | -0.0298 | -0.1892 |
| <b>C2</b>  | -0.0188 | 0.0042  | 0.0417  | 0.0356  |
| <b>C3</b>  | -0.0876 | -0.0376 | -0.0340 | -0.1088 |
| <b>C4</b>  | -0.1070 | -0.0900 | -0.1270 | -0.0606 |
| <b>C5</b>  | 0.0015  | 0.0155  | 0.0307  | 0.0054  |
| <b>C6</b>  | -0.0945 | -0.1035 | -0.0345 | -0.0991 |
| <b>O1</b>  | 0.0825  | 0.1304  | 0.1117  | 0.0962  |
| <b>O2</b>  | 0.0170  | -0.0097 | 0.0018  | 0.0123  |
| <b>O3</b>  | -0.0533 | -0.1324 | -0.0938 | -0.1856 |
| <b>H1</b>  | -0.0458 | -0.0995 | -0.0867 | -0.0660 |
| <b>H2</b>  | 0.0631  | 0.0357  | 0.0061  | 0.0582  |
| <b>H3</b>  | 0.0162  | 0.0764  | -0.0068 | 0.0834  |
| <b>H4</b>  | 0.0428  | -0.0039 | 0.0140  | -0.0058 |
| <b>H5</b>  | -0.0092 | -0.0294 | -0.0047 | -0.0258 |
| <b>H6</b>  | 0.0382  | 0.0184  | 0.0120  | 0.0385  |
| <b>H7</b>  | 0.0786  | 0.0873  | 0.0625  | 0.0838  |
| <b>H8</b>  | 0.0068  | 0.0921  | 0.0420  | 0.1259  |
| <b>H9</b>  | 0.0586  | 0.0561  | 0.0217  | 0.1057  |
| <b>H10</b> | 0.0324  | 0.0634  | 0.0519  | 0.0022  |
| <b>H11</b> | 0.0652  | 0.0691  | 0.0027  | 0.0242  |
| <b>H12</b> | 0.0253  | 0.0330  | -0.0154 | 0.0211  |

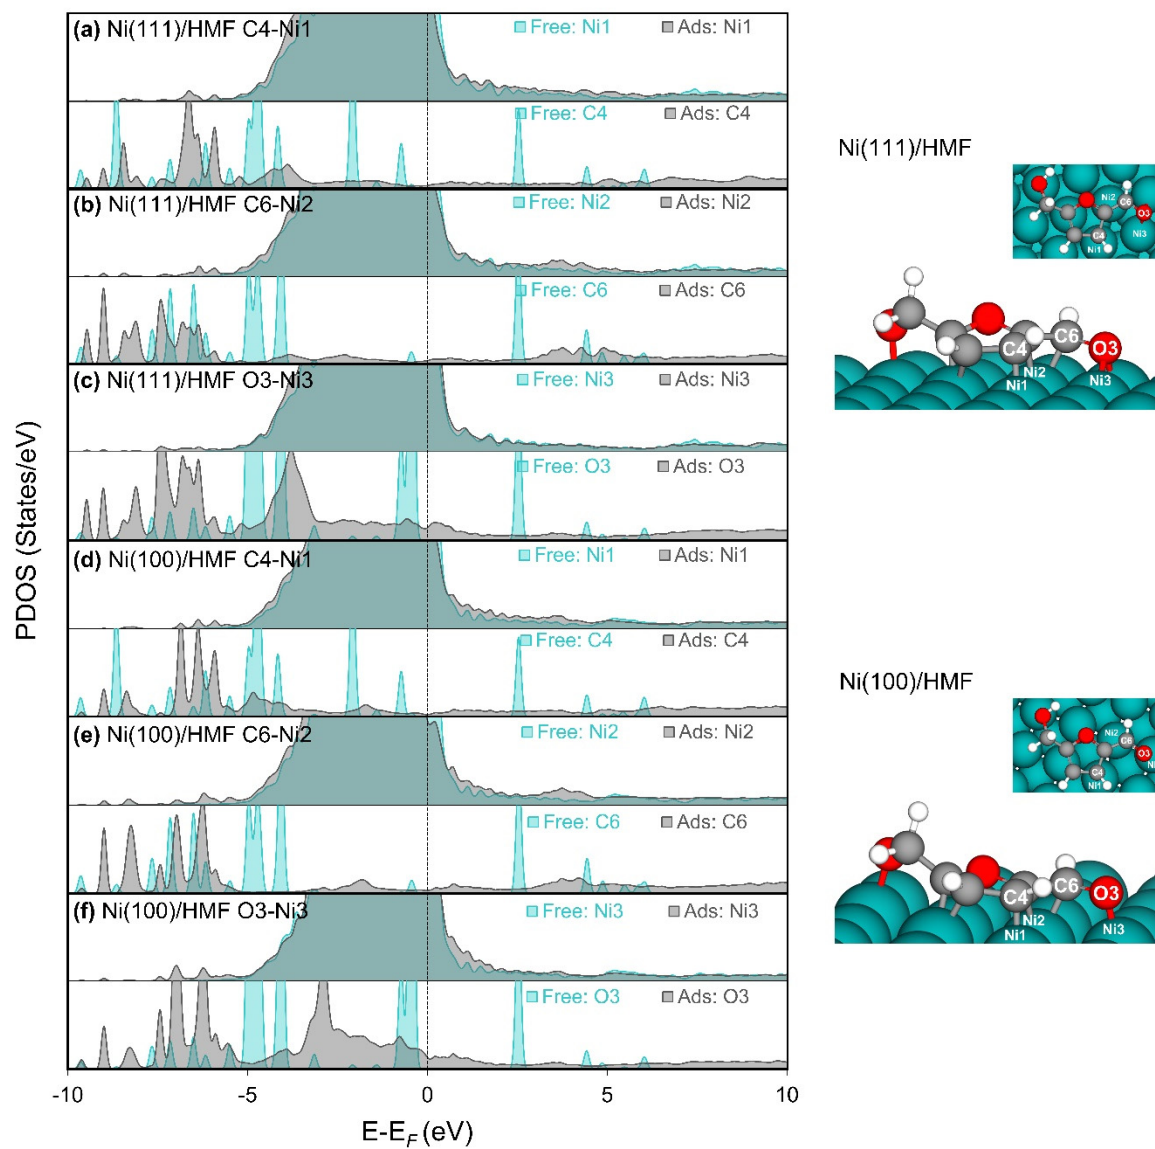

**Figure S6** PDOS peaks of PDOS plots of selected atoms of (a-c) HMF adsorption on Ni(111) of the relevant configuration on the right panel and (d-f) HMF adsorption on Ni(100) surfaces of the relevant configuration on the right panel. The  $3d$ -states of Cu and  $2p$ -states of C and O are compared between pre-adsorption and adsorption processes.

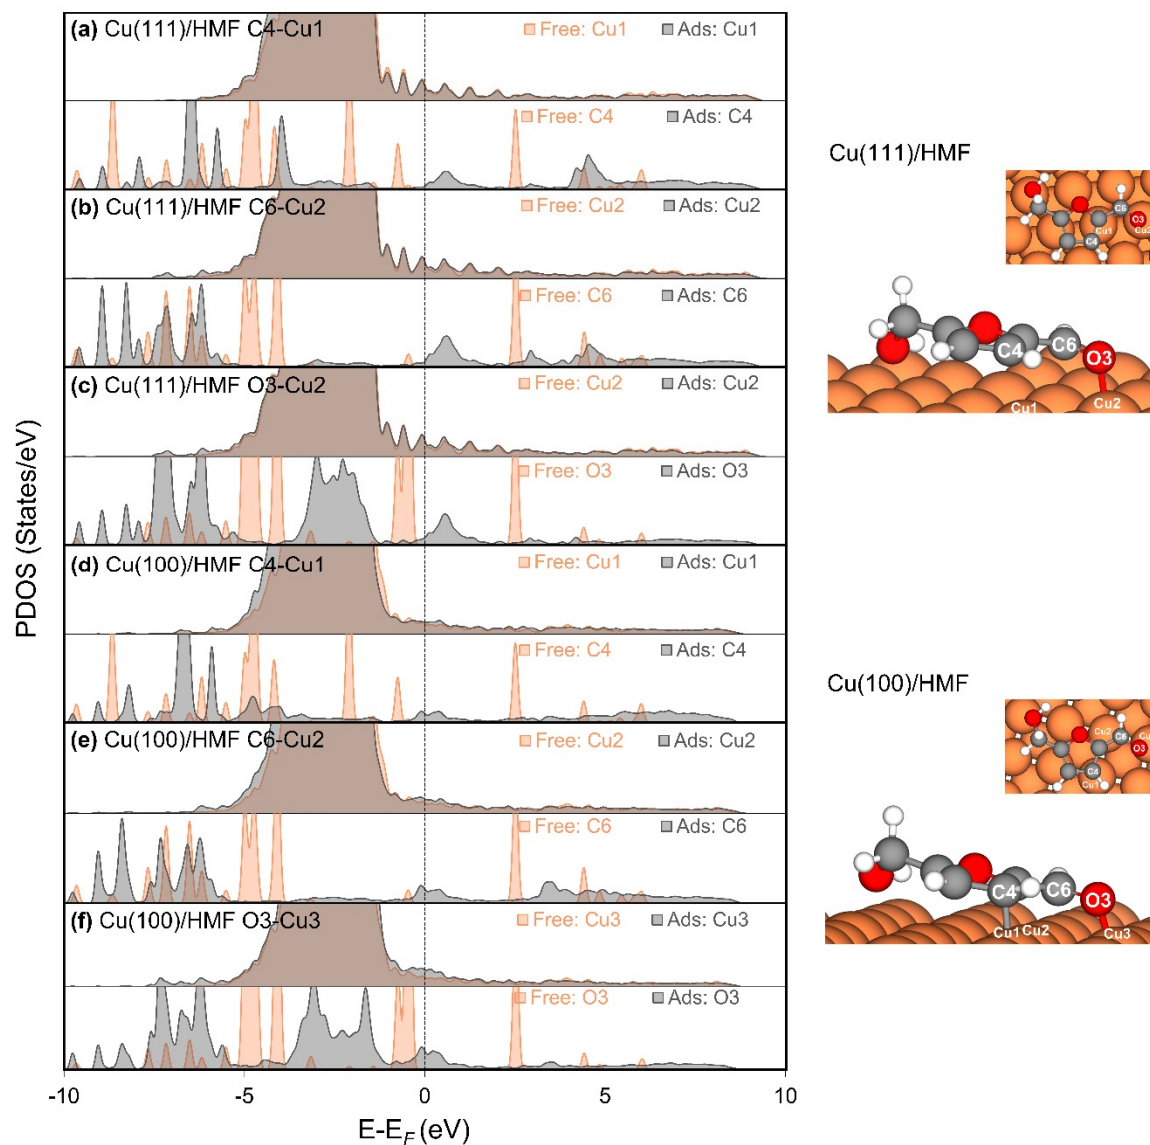

**Figure S7** PDOS peaks of PDOS plots of selected atoms of (a-c) HMF adsorption on Cu(111) of the relevant configuration on the right panel and (d-f) HMF adsorption on Cu(100) surfaces of the relevant configuration on the right panel. The  $3d$ -states of Cu and  $2p$ -states of C and O are compared between pre-adsorption and adsorption processes.
